# Supplementary material for: Employing an orthotopic model to study the role of epithelial-mesenchymal transition in bladder cancer metastasis
Source: PubMed Central journal article supplement (PMC5470961; doi:10.18632/oncotarget.11009), 2016-08-02
Supplement: oncotarget-08-34205-s001.pdf [file oncotarget-08-34205-s001.pdf]

## **Employing an orthotopic model to study the role of epithelial-mesenchymal transition in bladder cancer metastasis**

### **Supplementary Materials**

**Supplementary Table S1: Differentially expressed genes in CTCs versus the other tumor sites with  $FDR < 0.05$ ,  $p < 0.001$ , and fold-change  $\geq 1.5$  using the class comparison tool within BRB array tools. See Supplementary\_Table\_S1**
